# Supplementary material for: Public understanding of net zero: Conflicted perceptions of different mitigation pathways between feasibility and desirability
Source: Research Square preprint supplement (doi:10.21203/rs.3.rs-7379576/v1), 2025-08-22
Supplement: Supplementary file 1 [file f887b15f29dbc393942612a0.docx]

**Public understanding of net zero: Conflicted perceptions of different mitigation pathways between feasibility and desirability**

Shinichiro Asayama, Shinichiro Fujimori, Ken Oshiro, Tomoko Hasegawa, Hiroto Shiraki, Masahiro Sugiyama

**Consolidated criteria for reporting qualitative studies (COREQ): 32-item checklist**

| **Domain 1: Research team and reflexivity** | |
| --- | --- |
| Personal Characteristics | |
| 1. Interviewer/facilitator | A professional facilitator outside the research group |
| 1. Credentials | Not available |
| 1. Occupation | Self-employed business on professional facilitation and training for interview skills |
| 1. Gender | Female |
| 1. Experience and training | Long-time experience in conducting focus groups, mostly for marketing research |
| Relationship with participants | |
| 1. Relationship established | None |
| 1. Participant knowledge of the interviewer | None |
| 1. Interviewer characteristics | The focus group moderator had no prior expert knowledge of the research topic. |
| **Domain 2: study design** | |
| Theoretical framework | |
| 1. Methodological orientation and Theory | Frame analysis |
| Participant selection | |
| 1. Sampling | Purposive sampling |
| 1. Method of approach | Participants were recruited from survey panellists of a marketing research firm. |
| 1. Sample size | 36 (6 focus groups, each with 6 participants) |
| 1. Non-participation | None |
| Setting | |
| 1. Setting of data collection | A meeting room of the marketing research firm in downtown Tokyo, Japan |
| 1. Presence of non-participants | A transcriber was present in the corner of the room besides the participants and the moderator; researchers hid in a separate monitoring room and observed discussions from there. |
| 1. Description of sample | Participants were people living in the Greater Tokyo area. Sampling was designed to include participants from a range of different social backgrounds across age, gender, education level, marital status, family composition, household income and occupation type. |
| Data collection | |
| 1. Interview guide | Information materials (vignettes with text and pictures) explaining the research topic were provided to help participants understand the topic and stimulate conversation. |
| 1. Repeat interviews | No |
| 1. Audio/visual recording | Focus groups were audio recorded and transcribed by the marketing research firm. |
| 1. Field notes | Focus groups were transcribed by the marketing research firm. |
| 1. Duration | 2 hours |
| 1. Data saturation | No |
| 1. Transcripts returned | No |
| **Domain 3: analysis and findings** | |
| Data analysis | |
| 1. Number of data coders | 1 |
| 1. Description of the coding tree | No |
| 1. Derivation of themes | Main themes and frames were derived from the data and inductively identified through an iterative process of close reading and thematic coding. |
| 1. Software | Not applicable |
| 1. Participant checking | No |
| Reporting | |
| 1. Quotations presented | Representative participant quotations were presented to illustrate the findings with group and participant numbers. |
| 1. Data and findings consistent | The main findings (frames) and the supporting data (participant quotations) were presented consistently. |
| 1. Clarity of major themes | The summaries of major themes were presented in Tables 2-5 and Figure 2. |
| 1. Clarity of minor themes | The description of minor themes was discussed and the supporting data were presented in supplementary information. |
